# Supplementary material for: Association Between Human Papillomavirus Infection Among Pregnant Women and Preterm Birth
Source: PubMed Central journal article supplement (PMC8444026; doi:10.1001/jamanetworkopen.2021.25308), 2021-09-15

## Supplementary Online Content

Niyibizi J, Mayrand MH, Audibert F, et al. Association between human papillomavirus infection among pregnant women and preterm birth. *JAMA Netw Open*. 2021;4(9):e2125308. doi:10.1001/jamanetworkopen.2021.25308

**eFigure 1.** Covariates Balance Before and After Weighting Data by IPTW of Propensity Score of Any HPV at First Trimester

**eFigure 2.** Covariates Balance Before and After Weighting Data by IPTW of Propensity Score of Any Placental HPV

**eFigure 3.** Kaplan-Meier Curves Presenting the Cumulative Incidence of Preterm Birth According to HPV16/18 Persistence During Pregnancy

This supplementary material has been provided by the authors to give readers additional information about their work.

**eFigure 1.** Covariates Balance Before and After Weighting Data by IPTW of Propensity Score of any HPV at First Trimester

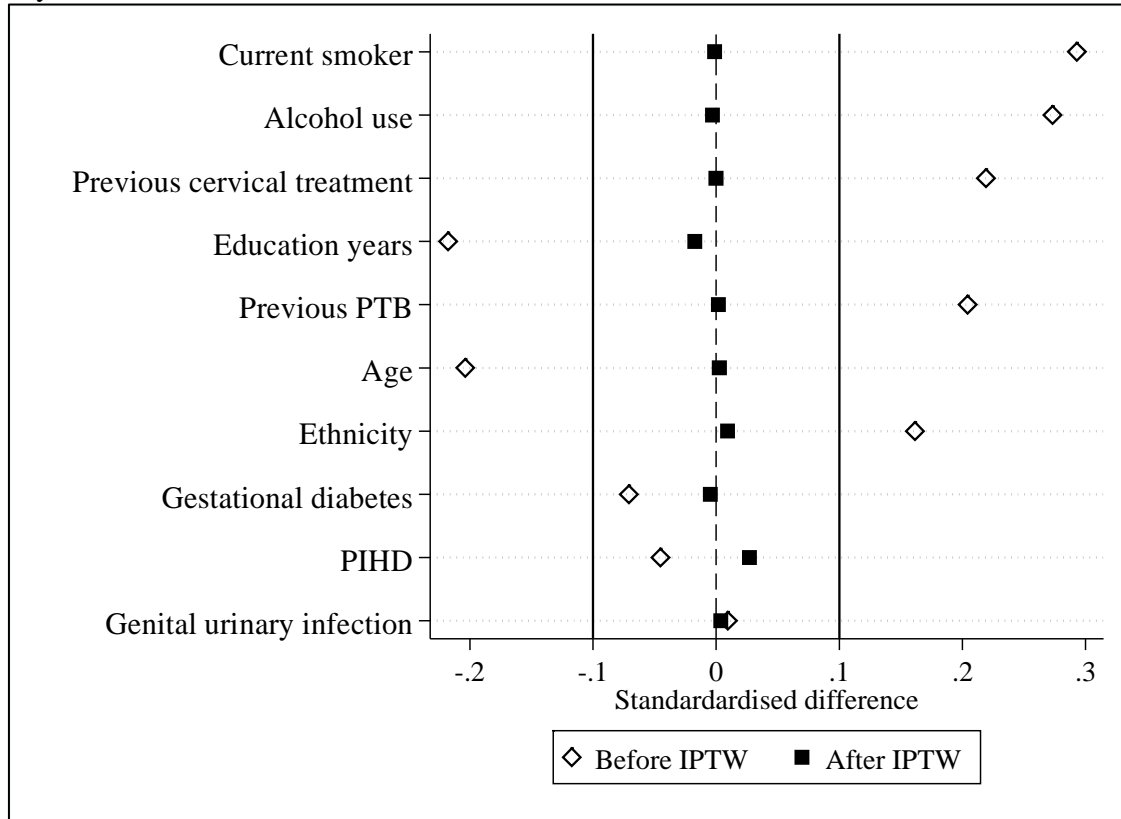

PTB: preterm birth; PIHD: pregnancy induced hypertensive disorders; IPTW: inverse probability treatment weighting

**eFigure 2.** Covariates Balance Before and After Weighting Data by IPTW of Propensity Score of any Placental HPV

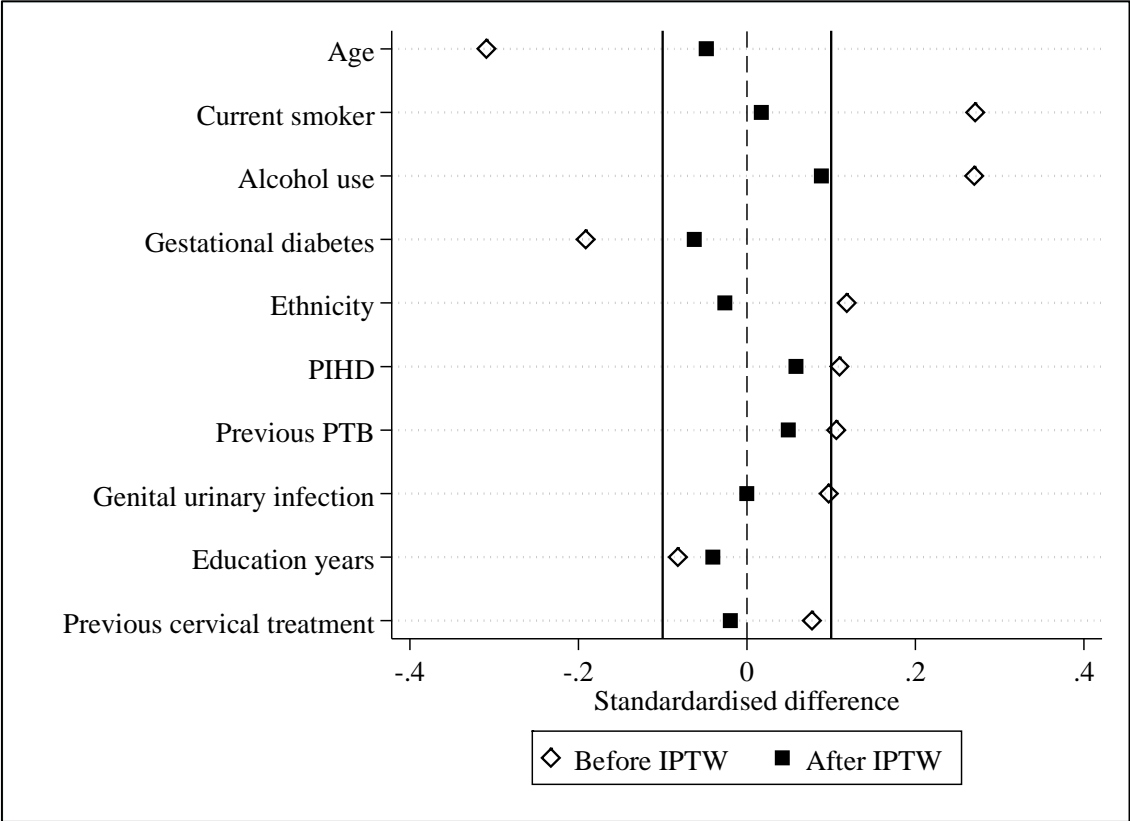

PTB: preterm birth; PIHD: pregnancy induced hypertensive disorders; IPTW: inverse probability treatment weighting

**eFigure 3.** Kaplan-Meier Curves Presenting the Cumulative Incidence of Preterm Birth According to HPV16/18 Persistence During Pregnancy

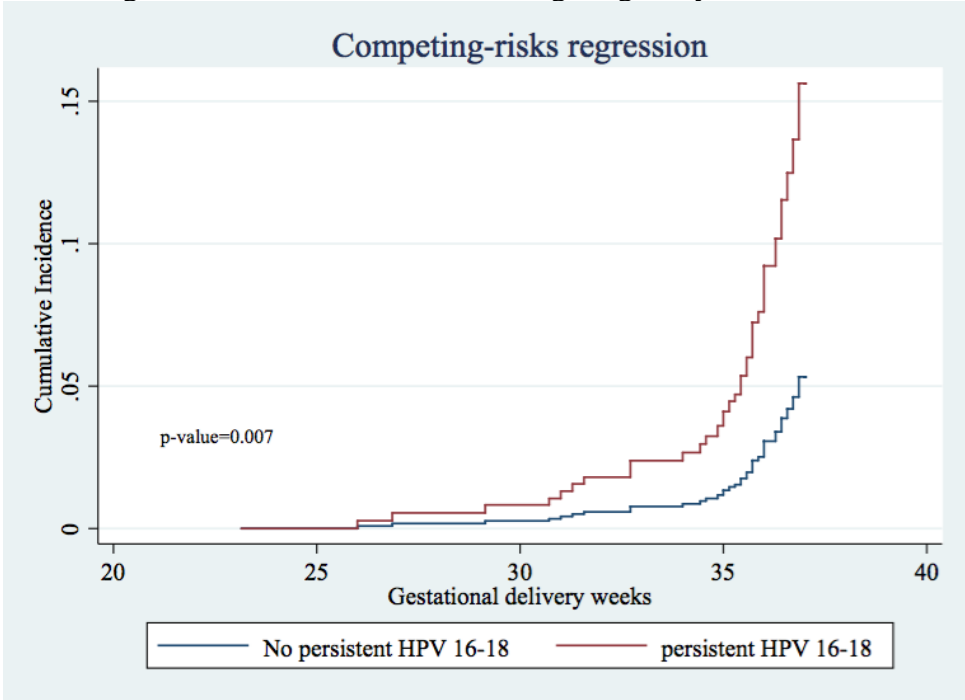

Supplement: jamanetwopen-e2125308-s001.pdf [file jamanetwopen-e2125308-s001.pdf]
