# Supplementary material for: Association Between Human Papillomavirus Infection Among Pregnant Women and Preterm Birth
Source: PubMed Central journal article supplement (PMC8444026; doi:10.1001/jamanetworkopen.2021.25308), 2021-09-15
Supplement: jamanetwopen-e2125308-s002.pdf [file jamanetwopen-e2125308-s002.pdf]

\*Indicates required information. Only first name, last name, and suffix will appear in PubMed.

| <b>*Group Name(s): HERITAGE study group</b> |                   |                              |                  |                                                                                               |                                          |                                                         |                                                                                            |
|---------------------------------------------|-------------------|------------------------------|------------------|-----------------------------------------------------------------------------------------------|------------------------------------------|---------------------------------------------------------|--------------------------------------------------------------------------------------------|
| <b>*First Name and Middle Initial(s)</b>    | <b>*Last Name</b> | <b>*Suffix (eg, Jr, III)</b> | Academic Degrees | Institution                                                                                   | Location (city, state/province, country) | Role or Contribution, eg, chair, principal investigator | Group (if more than 1 Group listed in the byline) and/or Subgroup (eg, Steering Committee) |
| Helen                                       | Trottier          |                              | MSc, PhD         | Université de Montréal and Sainte-Justine University Hospital Center                          | Montreal, Qc, Canada                     | Principal Investigator                                  |                                                                                            |
| Marie-Hélène                                | Mayrand           |                              | MD, PhD          | Université de Montréal, Centre de Recherche du Centre Hospitalier de l'Université de Montréal | Montreal, Qc, Canada                     | Co-investigator                                         |                                                                                            |
| François                                    | Coutlée           |                              | MD               | Université de Montréal, Centre de Recherche du Centre Hospitalier de l'Université de Montréal | Montreal, Qc, Canada                     | Co-investigator                                         |                                                                                            |
| Patricia                                    | Monnier           |                              | MD, PhD          | Research Institute of the McGill University Health Center                                     | Montreal, Qc, Canada                     | Co-investigator                                         |                                                                                            |
| Louise                                      | Laporte           |                              | Bacc.            | Sainte-Justine University Hospital Research Center                                            | Montreal, Qc, Canada                     | Study manager                                           |                                                                                            |
| Joseph                                      | Niyibizi          |                              | MD, PhD          | Université de Montréal and Sainte-Justine University Hospital Center                          | Montreal, Qc, Canada                     | Research Assistant                                      |                                                                                            |
| Monica                                      | Zahreddine        |                              | MD, MSc          | Sainte-Justine University Hospital Center                                                     | Montreal, Qc, Canada                     | Research Assistant                                      |                                                                                            |
| Ana Maria                                   | Carceller         |                              | MD               | Sainte-Justine University Hospital Center                                                     | Montreal, Qc, Canada                     | Co-investigator                                         |                                                                                            |
| Paul                                        | Brassard          |                              | MD, MSc          | Research Institute of the McGill University Health Center                                     | Montreal, Qc, Canada                     | Co-investigator                                         |                                                                                            |
| Jacques                                     | Lacroix           |                              | MD               | Université de Montréal and Sainte-Justine University Hospital Center                          | Montreal, Qc, Canada                     | Co-investigator                                         |                                                                                            |
| Diane                                       | Francoeur         |                              | MD               | Université de Montréal and Sainte-Justine University Hospital Center                          | Montreal, Qc, Canada                     | Co-investigator                                         |                                                                                            |
| Marie-Josée                                 | Bédard            |                              | MD               | Université de Montréal, Centre Hospitalier de l'Université de Montréal                        | Montreal, Qc, Canada                     | Site investigator                                       |                                                                                            |
| Isabelle                                    | Girard            |                              | MD               | St-Mary's Hospital Center                                                                     | Montreal, Qc, Canada                     | Site investigator                                       |                                                                                            |

Supplemental Online Content: Nonauthor Collaborators

\*Indicates required information. Only first name, last name, and suffix will appear in PubMed.

| <b>*First Name and Middle Initial(s)</b> | <b>*Last Name</b> | <b>*Suffix (eg, Jr, III)</b> | Academic Degrees | Institution                                                                                     | Location (city, state/province, country) | Role or Contribution, eg, chair, principal investigator | Group (if more than 1 Group listed in the byline) and/or Subgroup (eg, Steering Committee) |
|------------------------------------------|-------------------|------------------------------|------------------|-------------------------------------------------------------------------------------------------|------------------------------------------|---------------------------------------------------------|--------------------------------------------------------------------------------------------|
| François                                 | Audibert          |                              | MD               | Université de Montréal and Sainte-Justine University Hospital Center                            | Montreal, Qc, Canada                     | Site investigator                                       |                                                                                            |
| William                                  | Fraser            |                              | MD, MSc          | Université de Sherbrooke, Centre de recherche du Centre Hospitalier Universitaire de Sherbrooke | Sherbrooke, Qc, Canada                   | Co-investigator                                         |                                                                                            |
